# Supplementary material for: Electrochemiluminescent molecular logic gates based on MCNTs for the multiplexed analysis of mercury(ii) and silver(i) ions
Source: Royal Society of Chemistry journal article supplement (doi:10.1039/c6ra02531e), 2016-01-01
Supplement: c6ra02531e1.pdf [file c6ra02531e1.pdf]

## Electronic Supplementary Information

### **Electrochemiluminescence-molecular logic gates based on MCNTs for the multiplexed analysis of mercury (II) and silver (I) ions**

Haiyun Liu,<sup>a</sup> Lina Zhang,<sup>b</sup> Meng Li,<sup>a</sup> Mei Yan,<sup>a</sup> Mei Xue,<sup>c</sup> Yan Zhang,<sup>a</sup> Min Su,<sup>a</sup>  
Jinghua Yu<sup>a</sup> and Shenguang Ge<sup>a†</sup>

<sup>a</sup> Key Laboratory of Chemical Sensing & Analysis in Universities of Shandong,  
School of Chemistry and Chemical Engineering, University of Jinan, Jinan 250022, P.  
R. China

<sup>b</sup> Shandong Provincial Key Laboratory of Preparation and Measurement of Building  
Materials, University of Jinan, Jinan 250022, P. R. China

<sup>c</sup> College of Chemistry, Chemical Engineering and Materials Science, Shandong  
Normal University, Jinan, 250014, P. R. China

## Selectivity of the logic system

To test the selectivity of the sensing system, other metal ions were used in place of  $\text{Hg}^{2+}$  and  $\text{Ag}^+$ . We systemically challenged the assay with 11 interference metal ions. Fig. S1 depicts the OR system activated with 11 interference metal ions of high concentration (10  $\mu\text{M}$ ) and  $\text{Hg}^{2+}$  (10 nM),  $\text{Ag}^+$  (10 nM). Clearly, the reference metal ions did not interfere with the OR logic system even present with a higher concentration, demonstrating high selectivity of this sensing system for detecting  $\text{Hg}^{2+}$  and  $\text{Ag}^+$ .

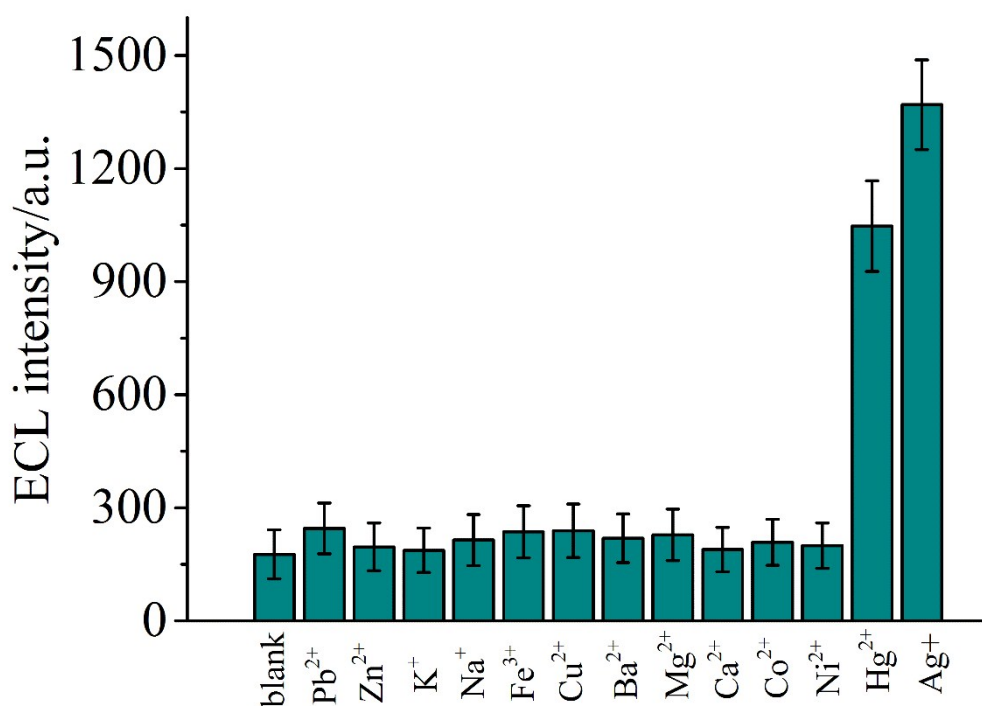

**Fig. S1** ECL detection of  $\text{Hg}^{2+}$ ,  $\text{Ag}^+$  ions or other metal ions, such as  $\text{Pb}^{2+}$ ,  $\text{Zn}^{2+}$ ,  $\text{K}^+$ ,  $\text{Na}^+$ ,  $\text{Fe}^{3+}$ ,  $\text{Cu}^{2+}$ ,  $\text{Ba}^{2+}$ ,  $\text{Mg}^{2+}$ ,  $\text{Ca}^{2+}$ ,  $\text{Co}^{2+}$ ,  $\text{Ni}^{2+}$  in the OR logic gate. The concentrations for  $\text{Hg}^{2+}$ ,  $\text{Ag}^+$  and other metal ions are of 10 nM, 10 nM and 10  $\mu\text{M}$ , respectively.

## INHIBIT gate

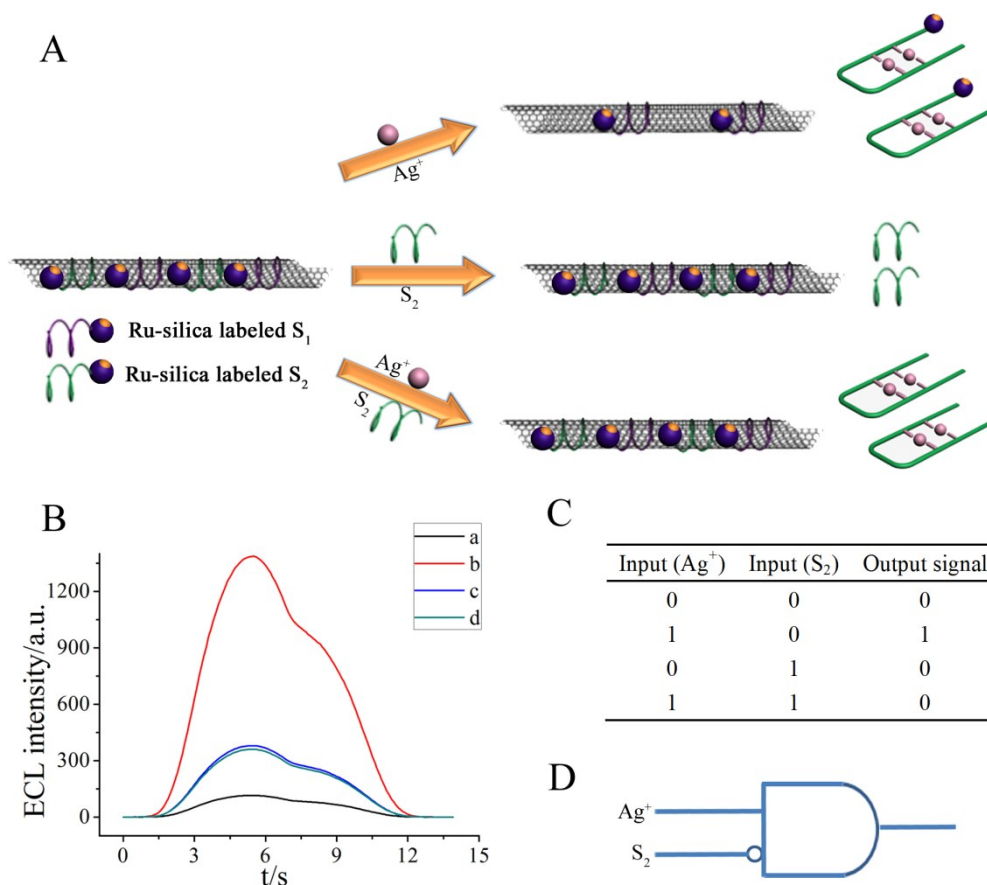

**Fig. S2** (A) Schematic representation of the INHIBIT logic gate based on MCNTs/Ru-silica labeled  $\text{S}_1$ /Ru-silica labeled  $\text{S}_2$  complex. (B) ECL intensity vs time curves of the INHIBIT logic gate: (a) MCNTs/Ru-silica labeled  $\text{S}_1$ /Ru-silica labeled  $\text{S}_2$  complex. (b) MCNTs/Ru-silica labeled  $\text{S}_1$ /Ru-silica labeled  $\text{S}_2$  complex treated with 10 nM  $\text{Ag}^+$ . (c) MCNTs/Ru-silica labeled  $\text{S}_1$ /Ru-silica labeled  $\text{S}_2$  complex treated with 2  $\mu\text{M}$   $\text{S}_2$ . (d) MCNTs/Ru-silica labeled  $\text{S}_1$ /Ru-silica labeled  $\text{S}_2$  complex treated with 10 nM  $\text{Ag}^+$  and 2  $\mu\text{M}$   $\text{S}_2$ . (C) The truth table of the INHIBIT logic gate. (D) The symbol of the INHIBIT logic gate.

We designed another INHIBIT logic gate for  $\text{Ag}^+$  in the similar way as the previous INHIBIT logic gate by using  $\text{Ag}^+$  and  $\text{S}_2$  as inputs, which was expressed in

Fig. S2A. Fig. S2B showed the ECL intensity of MCNTs/Ru-silica labeled  $S_1$ /Ru-silica labeled  $S_2$  complex at different conditions. The ECL intensity of Ru-silica labeled  $S_2$  was restored upon the addition of  $Ag^+$ , which bound with Ru-silica labeled  $S_2$  and induced the recovery of the ECL intensity of Ru-silica nanoparticles. Apparent increase of the ECL intensity was not obtained after the addition of  $S_2$ . However, the ECL intensity was decreased largely when the mixture of  $S_2$  and  $Ag^+$  was added, which was because that C- $Ag^+$ -C complex was formed commendably and suppressed the  $Ag^+$ -induced ECL recovery of Ru-silica nanoparticles. The results were also in accord with the truth table of the INHIBIT logic gate (Fig. S2C).

### **NOR gate**

We built another NOR logic gate for  $Ag^+$  in the similar way as the previous NOR logic gate by using  $S_2$  and cysteine (Cys) as inputs, which was expressed in Fig. S3A. Fig. S3B showed the ECL intensity of MCNTs/Ru-silica labeled  $S_1$ /Ru-silica labeled  $S_2$  complex at different conditions. When there was no input, the ECL intensity of Ru-silica labeled  $S_2$  was restored, which was because that  $Ag^+$  bound with Ru-silica labeled  $S_2$  and induced the recovery of the ECL intensity of Ru-silica nanoparticles. In the logic gate, unlabeled  $S_2$  and Cys could both bind with  $Ag^+$  via forming special structures. Consequently, inputting any one or both of them, the  $Ag^+$ -induced recovery of the ECL intensity of the Ru-silica could be inhibited, indicating that both  $S_2$  and Cys prevented the desorption of Ru-silica labeled  $S_2$  from MCNTs. The truth table of the resulting NOR logic gate was given in the Fig. S3C.

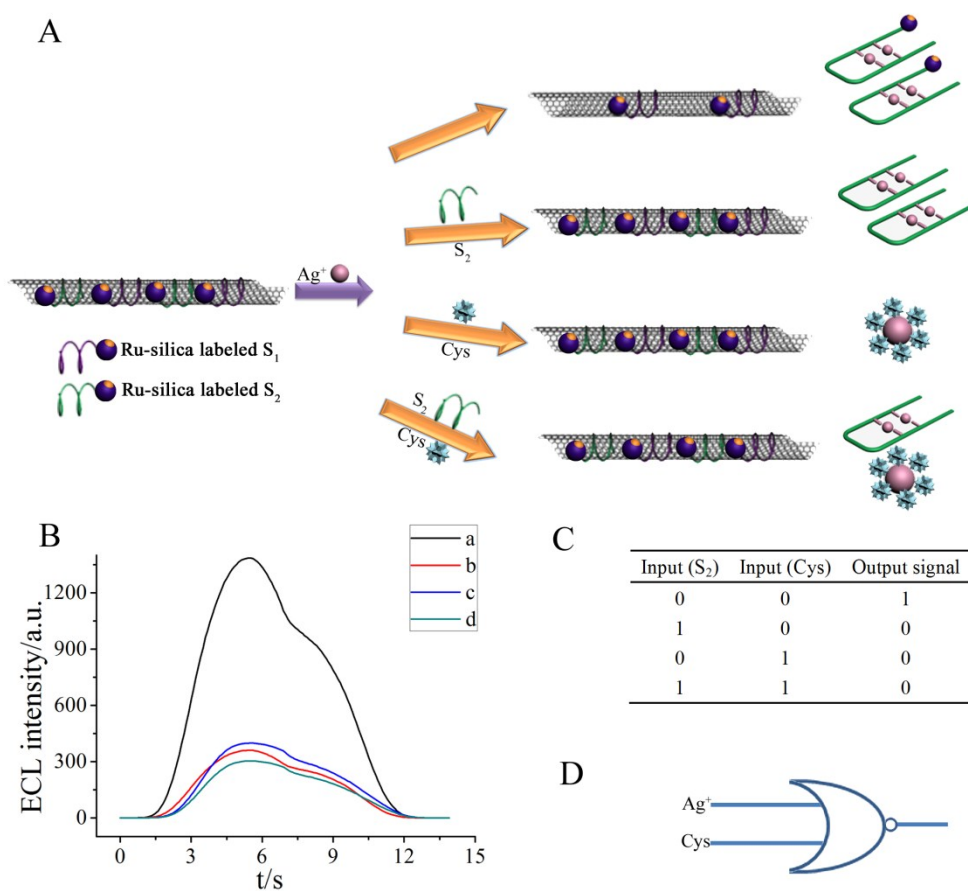

**Fig. S3** (A) Schematic representation of the NOR logic gate based on treated MCNTs/Ru-silica labeled  $S_1$ /Ru-silica labeled  $S_2$  complex by 10 nM  $Ag^+$ . (B) ECL intensity vs time curves of the NOR logic gate: (a) The treated MCNTs/Ru-silica labeled  $S_1$ /Ru-silica labeled  $S_2$  complex by 10 nM  $Ag^+$ . (b) The treated MCNTs/Ru-silica labeled  $S_1$ /Ru-silica labeled  $S_2$  complex by 10 nM  $Ag^+$  was then treated with 2  $\mu M$   $S_2$ . (c) The treated MCNTs/Ru-silica labeled  $S_1$ /Ru-silica labeled  $S_2$  complex by 10 nM  $Ag^+$  was then treated with 300 nM Cys. (d) the treated MCNTs/Ru-silica labeled  $S_1$ /Ru-silica labeled  $S_2$  complex by 10 nM  $Ag^+$  was then treated with 2  $\mu M$   $S_2$  and 300 nM Cys. (C) The truth table of the NOR logic gate. (D) The symbol of the NOR logic gate.

### Analytical performance of $I^-$ and Cys

Fig. S4A illustrated the ECL intensity changes of the MCNTs/Ru-silica labeled  $S_1$ /Ru-silica labeled  $S_2$  complex upon addition of various concentrations of  $I^-$  when

the concentration of  $\text{Hg}^{2+}$  was 10 nM. A linear relationship between the ECL intensity and the concentrations of  $\text{I}^-$  over a range of 100 nM to  $10\mu\text{M}$  (inset of Fig. S4A) was obtained by analyzing the change of ECL intensity with the concentrations of  $\text{I}^-$ . In addition, Fig. S4B was the ECL intensity changes of the MCNTs/Ru-silica labeled  $\text{S}_1$ /Ru-silica labeled  $\text{S}_2$  complex upon addition of various concentrations of Cys when the concentration of  $\text{Ag}^+$  was 3 nM. As shown in the inset of Fig. S4B, the ECL intensity was linear over the logarithm of Cys concentration ranging from 3 to 300 nM. The detection limits of  $\text{I}^-$  and Cys were  $0.1\mu\text{M}$  and 10 nM, respectively.

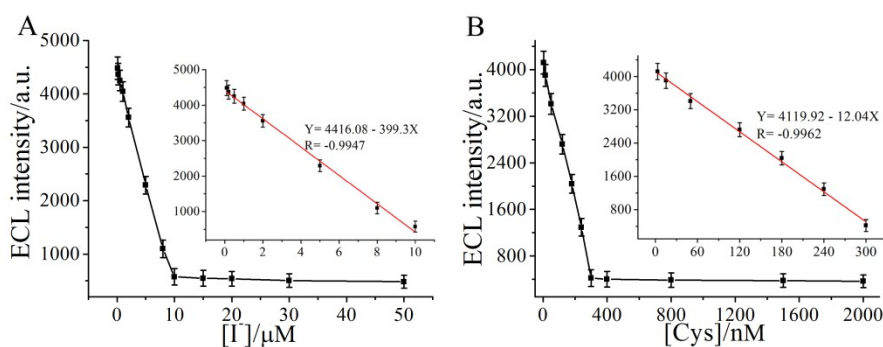

**Fig. S4** Relationship between ECL intensity and (A)  $\text{I}^-$  and (B) Cys concentration in pH 7.4 PBS containing  $1.0 \times 10^{-5} \text{ mol}\cdot\text{L}^{-1}$  TPA. Inset: Calibration curve of the ECL signals for (A)  $\text{I}^-$  and (B) Cys, respectively.
